# Supplementary material for: Anchoring ruthenium nanoclusters using an electron-donating fullerene carbon matrix for high-performance hydrogen evolution
Source: Royal Society of Chemistry journal article supplement (doi:10.1039/d5nr04618a), 2026-01-01
Supplement: d5nr04618a1.pdf [file d5nr04618a1.pdf]

## Supplementary Information

### **Anchoring Ruthenium Nanoclusters by an Electron-Donating Fullerene Carbon Matrix for High-Performance Hydrogen Evolution**

*Ying Wang<sup>a</sup>, Yongqiang Feng<sup>\*a</sup>, Jun Zhang<sup>a</sup>, Qunzhi Ma<sup>a</sup>, Jiayi Li<sup>a</sup>, Wei Liu<sup>a</sup>, Wenyu Wang<sup>a</sup>, Yirong Qi<sup>a</sup>, Qingqing Liu<sup>a</sup>, Xu Li<sup>a</sup>, Xiaojie Ma<sup>a</sup>*

*<sup>a</sup> School of Materials Science and Engineering, Shaanxi University of Science and Technology, Xi'an 710021, China*

Corresponding authors: [fengyq@sust.edu.cn](mailto:fengyq@sust.edu.cn)

## Content

|                                                                                                                                                                                                                                        |          |
|----------------------------------------------------------------------------------------------------------------------------------------------------------------------------------------------------------------------------------------|----------|
| Experimental Sections.....                                                                                                                                                                                                             | 4        |
| <b>1. General material.....</b>                                                                                                                                                                                                        | <b>4</b> |
| <b>2. Synthesis of defective fullerene carbon fragment (FCF).....</b>                                                                                                                                                                  | <b>4</b> |
| <b>3. Synthesis of Ru/FCF-600, Ru/FCF-500 and Ru/FCF-700.....</b>                                                                                                                                                                      | <b>5</b> |
| <b>4. Materials Characterization. ....</b>                                                                                                                                                                                             | <b>6</b> |
| <b>5. Electrochemical measurement. ....</b>                                                                                                                                                                                            | <b>6</b> |
| Additional Figures and Tables .....                                                                                                                                                                                                    | 10       |
| <b>Figure S1.</b> SEM image of a) $C_{60}$ /SBA-15, b) FCF, c) Ru/FCF, d) Ru/FCF-600. ....                                                                                                                                             | 10       |
| <b>Figure S2.</b> TEM images of a) SBA-15 and b) FCF.....                                                                                                                                                                              | 11       |
| <b>Figure S3.</b> TEM images of the Ru/FCF-600. ....                                                                                                                                                                                   | 12       |
| <b>Figure S4.</b> Structural and morphological characterization of Ru/FCF-500. a) HRTEM image, b) SAED pattern, c) Corresponding elemental mapping images of C (green) and Ru (red). ....                                              | 13       |
| <b>Figure S5.</b> Structural and morphological characterization of Ru/FCF-700. a) HRTEM image, b) SAED pattern, c) Corresponding elemental mapping images of C (green) and Ru (red). ....                                              | 14       |
| <b>Figure S6.</b> a) XPS survey spectra of Ru/FCF-500 and Ru/FCF-700. b) C 1s, c) Ru 3p spectra of Ru/FCF-500 and Ru/FCF-700. d) O 1s spectra of Ru/FCF-500, Ru/FCF-600, Ru/FCF-700, and commercial Ru/C. ....                         | 15       |
| <b>Figure S7.</b> XRD patterns of Ru-RuO <sub>2</sub> /FCF-600 and Ru/CNT-600. ....                                                                                                                                                    | 16       |
| <b>Figure S8.</b> a) XPS survey spectra of Ru-RuO <sub>2</sub> /FCF-600 and Ru/CNT-600. b) C 1s, c) Ru 3p spectra of Ru-RuO <sub>2</sub> /FCF-600 and Ru/CNT-600. d) O 1s spectra of Ru-RuO <sub>2</sub> /FCF-600 and Ru/CNT-600. .... | 17       |
| <b>Figure S9.</b> Cyclic Voltammetry (CV) Curve for Calibration of Hg/HgO Reference Electrode in 1 M KOH. ....                                                                                                                         | 18       |
| <b>Figure S10.</b> LSV curves of Ru-RuO <sub>2</sub> /FCF-600 and Ru/CNT-600.....                                                                                                                                                      | 19       |
| <b>Figure S11.</b> Nyquist plots of Ru/FCF-500, Ru/FCF-600, Ru/FCF-700, 20% Pt/C and commercial Ru/C of HER in 1.0 M KOH. ....                                                                                                         | 20       |
| <b>Figure S12.</b> a) Ru/FCF-500, b) Ru/FCF-600, c) Ru/FCF-700 with a scan rate of 2,                                                                                                                                                  |          |

|                                                                                                                                                                                                                                                                                                              |    |
|--------------------------------------------------------------------------------------------------------------------------------------------------------------------------------------------------------------------------------------------------------------------------------------------------------------|----|
| 4, 6, 8, 10, and 12 mV s <sup>-1</sup> in 1 M KOH. d) The corresponding plots of current density difference against scan rate.....                                                                                                                                                                           | 21 |
| <b>Figure S13.</b> XPS spectra of Ru/FCF-600 after HER measurement. a) XPS survey spectrum, b) C 1s, c) Ru 3p, d) O 1s. ....                                                                                                                                                                                 | 22 |
| <b>Figure S14.</b> Structural and morphological characterization of Ru/FCF-600 after stability testing in 1 M KOH. a) TEM image, b) HRTEM image, c) SAED pattern, d) Corresponding elemental mapping images of C (green) and Ru (red). ....                                                                  | 23 |
| <b>Figure S15.</b> a-d) Background cycles (blue curves) and subsequent CO-stripping cycles (red curves) for Ru/FCF-500, Ru/FCF-600, Ru/FCF-700, and commercial Ru/C, respectively. The corresponding stripping charges, indicated by the red shaded areas, are obtained from the integrated peak areas. .... | 24 |
| <b>Table S1.</b> HER performance of the Ru/FCF-600 electrocatalyst in 1 M KOH....                                                                                                                                                                                                                            | 25 |
| <b>Table S2.</b> Comparison of TOFs of the PtRu/FCF under alkaline conditions with other reported HER catalysts. ....                                                                                                                                                                                        | 26 |
| <b>Table S3.</b> Summary of the recently reported Ru-based HER catalyst in 1 M KOH. ....                                                                                                                                                                                                                     | 27 |
| <b>Table S4.</b> Summary of the recently reported Ru-based OWS catalyst in 1 M KOH. ....                                                                                                                                                                                                                     | 29 |
| <b>Table S5.</b> The comparison of AEMWE performance for Ru/FCF-600 with other reported electrocatalysts in alkaline solution. ....                                                                                                                                                                          | 30 |

## Experimental Sections

### 1. General material

All chemical reagents were used as received without any further purification. Ruthenium trichloride ( $\text{RuCl}_3$ , 99%), potassium hydroxide ( $\text{KOH}$ ,  $\geq 90\%$ ), Nafion solution (5 wt.%), Pt/C (20 wt.%), Pluronic P123 tri-block copolymer (PEG-PPG-PEG, molecular mass = 5800), 1-chloronaphthalene, hydrofluoric acid ( $\text{HF}$ , 98%), tetraethyl orthosilicate (TEOS,  $\text{C}_8\text{H}_{20}\text{OSi}$ , 98%), Sodium borohydride ( $\text{NaBH}_4$ , 99%), isopropyl alcohol (IPA,  $(\text{CH}_3)_2\text{CHOH}$ ,  $\geq 99.7\%$ ) and hydrochloric acid ( $\text{HCl}$ , 36~38%), ethanol ( $\text{EtOH}$ ,  $\text{CH}_3\text{CH}_2\text{OH}$ , 99.7%) were purchased from Sinopharm Chemical Reagent Co., Ltd. Fullerene ( $\text{C}_{60}$ , 99.9%) was received from Beijing Funakang Biotechnology Co., Ltd. The hydrophilic carbon paper (CP) was purchased from CeTech Co., Ltd. The anion exchange membrane (3PK-130) was obtained from Wuhan Gaoshi Ruilian Technology Co., Ltd. Deionized water (DI, 18.25  $\text{M}\Omega/\text{cm}$ ) was produced from the ultra-pure purification system (ULUPURE, UPDR-I-10T).

### 2. Synthesis of defective fullerene carbon fragment (FCF)

The mesoporous template of SBA-15 was synthesized according to the literature.<sup>1</sup> Briefly, 2 g of P123 was first dissolved in 58 mL of 2 M  $\text{HCl}$ , TEOS was then slowly added and heated at 40 °C for 12 h. The mixture was then transferred into a Teflon-lined autoclave capped with a stainless steel vessel. After heating at 130 °C for 48 h, the precipitate was collected, washed with DI water and dried at 100 °C for 6 h followed by calcination at 540 °C. For the preparation of  $\text{MFC}_{60-x}$ , a modified approach was employed.<sup>1</sup> First, a saturated solution of fullerene  $\text{C}_{60}$  was prepared by dissolving 50

mg of C<sub>60</sub> in 5 mL of 1-chloronaphthalene. The SBA-15 mesoporous material was then impregnated with this solution for 48 h, allowing C<sub>60</sub> molecules to assemble within the pores. The resulting solid product, C<sub>60</sub>/SBA-15, was annealed at 900 °C for 5 h under an argon atmosphere to enhance the interaction between C<sub>60</sub> and the SBA-15 matrix. Finally, the template was removed by etching with hydrofluoric acid (HF), and the final sample was designated as FCF.

### **3. Synthesis of Ru/FCF-600, Ru/FCF-500 and Ru/FCF-700.**

The Ru/FCF-600 HER electrocatalyst was synthesized via a NaBH<sub>4</sub> reduction combined with solid-phase sintering method, with the detailed procedure as follows:

First, 43.5 mg of FCF was dispersed in a mixed solvent of ethanol (EtOH) and deionized water (DI water) (v/v = 1:2). Subsequently, 13 mg of RuCl<sub>3</sub> was impregnated into the above solution and vigorously stirred at 25 °C for 1 h to ensure thorough mixing. Next, a freshly prepared NaBH<sub>4</sub> solution (1 mg mL<sup>-1</sup>) was slowly added dropwise over 2 h under continuous stirring at room temperature. After complete addition, the reaction was allowed to proceed for an additional 2 h to ensure complete reduction. The resulting product was then filtered and washed multiple times with DI water and ethanol to remove impurities. The obtained solid was vacuum-dried at 60 °C for 12 h to yield the Ru/FCF precursor. The black powder obtained was placed in a corundum porcelain boat under the protection of Ar mixture in a tubular furnace, heated from room temperature to 600 °C at a heating rate of 5 °C min<sup>-1</sup>, and kept for 2 h. After cooling to room temperature, the black powder was collected and ground to obtain the target product Ru/FCF-600 electrocatalyst. For comparison, under identical experimental conditions,

Ru/FCF-500 and Ru/FCF-700 electrocatalysts were synthesized by adjusting the calcination temperature to 500 °C and 700 °C, respectively, to investigate the influence of temperature on the catalytic performance.

#### **4. Materials Characterization.**

The X-ray diffraction (XRD) was tested using Cu K $\alpha$  radiation ( $\lambda = 1.5406 \text{ \AA}$ ) on a Rigaku D/max-2200PC diffractometer (Japan). The topography and structure of the sample were analyzed using a scanning electron microscope (SEM, S4800). Raman spectrum was recorded on a Renishaw-invia instrument. The transmission electron microscopy (TEM) was carried out on a Themis Z/ORION704M scanning/transmission electron microscope manipulated at 300 kV. X-ray photoelectron spectroscopy (XPS) was obtained on a Thermo Kalpha X-ray photoelectron spectrometer with Al K $\alpha$  as the source gun. The electrochemical performance test was carried out on the CHI660E workstation (Shanghai Chenhua).

#### **5. Electrochemical measurement.**

The electrocatalytic performance was carried out on a CHI660E electrochemical workstation using a three-electrode system in 1 M KOH with glassy carbon electrode (GCE,  $\Phi = 3 \text{ mm}$ ), graphitic rod and Hg/HgO as the working, counter and reference electrode, respectively. Before all tests, the Hg/HgO reference electrode was calibrated against the reversible hydrogen potential (RHE) in H<sub>2</sub>-saturated 1 M KOH with Pt plate as the working electrode and Pt wire as the counter electrode. Thus, the potential can be obtained by the equation of  $E(\text{RHE}) = E(\text{Hg/HgO}) + 0.926$  (Figure S9). To prepare the working electrode, 5 mg of catalyst was sonicated in 150  $\mu\text{L}$  of IPA containing 8

$\mu\text{L}$  of Nafion solution to form a homogeneous ink. Then,  $2.4 \mu\text{L}$  of the suspension is loaded onto the polished GCE at a loading of  $1.076 \text{ mg cm}^{-2}$ . The linear scanning voltammetry (LSV) curve was recorded in a  $\text{N}_2$ -saturated  $1 \text{ M KOH}$  with a scan rate of  $3 \text{ mV s}^{-1}$ . Tafel slope was obtained by plotting the LSV curve using the equation of  $\eta = a + b \log j$ , where  $\eta$  refers to the overpotential,  $b$  is the Tafel slope and  $a$  denotes the intercept. The electrochemical impedance spectroscopy (EIS) were performed under open circuit potentials for all materials and the frequency range from  $0.1 \text{ Hz}$  to  $100 \text{ kHz}$  with an amplitude of  $5 \text{ mV}$  were used to carry out the experiment. For the specific double-layer capacitor ( $C_{\text{dl}}$ ) data, cyclic voltammetry (CV) curves were recorded in the non-Faradic region with scanning rate of  $2, 4, 6, 8, 10$  and  $12 \text{ mV s}^{-1}$ , and the  $C_{\text{dl}}$  ( $\text{mA cm}^{-2}$ ) can be obtained by plotting the current difference ( $\Delta j$ ) against the scanning rate. The electrochemical active surface area (ECSA) was estimated by the following equation of  $\text{ECSA} = C_{\text{dl}} / C_s \times S$ , where  $C_s$  ( $\mu\text{F cm}^{-2}$ ) represents the specific capacitance on the electrode surface and  $S$  ( $\text{cm}^2$ ) is the actual area of the working electrode. Generally,  $C_s$  is in the range of  $20\text{-}60 \mu\text{F cm}^{-2}$ , herein the averaged  $C_s$  value of  $40 \mu\text{F cm}^{-2}$  was used according the literature.

The Faradic efficiency of gas evolution was carried out using the water drainage method:

$$\eta_F = \frac{N_F}{N_T} = \frac{mnF}{It}$$

Where  $N_F$  is the actual charge consumed,  $N_T$  is the total charge flowing through the external circuit,  $m$  is the number of moles of hydrogen,  $n$  is the electron transferred by the reaction,  $F$  is Faraday's constant  $96485 \text{ C mol}^{-1}$ , and  $I$  and  $t$  are the current and

reaction time, respectively.

#### **Anion exchange membrane water electrolysis (AEMWE) measurement :**

Prior to the fabrication of the anion-exchange membrane water electrolyzer (AEMWE) system, the anion exchange membrane (AEM) was pretreated by soaking in 1.0 M KOH solution for 24 hours. The catalyst slurries prepared with Ru/FCF-600 and IrO<sub>2</sub> were used as the active materials for the cathode and anode, respectively. Employing the catalyst-coated substrate method, 3 mg of the cathode catalyst and 3 mg of the anode catalyst were separately deposited on carbon cloth with a gas diffusion layer (GDL), each with an area of 1×1 cm<sup>2</sup>. Subsequently, the AEMWE system was filled with 1.0 M KOH electrolyte, and the flow rate was controlled at 40 mL/min using a peristaltic pump. Thereafter, the performance of the AEMWE was evaluated using a Koster electrochemical workstation (CS310M) equipped with an electrocatalytic cell. The long-term stability of the device was tested via chronopotentiometry.

#### **Calculation of the turnover frequency (TOF):**

The turnover of frequency (TOF) was evaluated by CO-stripping measurement. Firstly, the prepared catalysts were tested in the N<sub>2</sub>-saturated 1.0 M KOH solution, and CV curves from 0.05 to 1.00 V vs. RHE were measured at a scan rate of 10 mV s<sup>-1</sup>. Secondly, a reduction potential (0.05 V vs. RHE) was applied to the working electrode while passing CO for 15 min, followed by N<sub>2</sub> for 15 min to drive the escape of excess CO out of the electrolyte. Then, re-running the CV test as described above, a distinct oxidation peak of CO can be observed at 0.6-0.8 V vs. RHE. Ultimately, the number of exposed active sites in the catalyst is determined by integrating the area of this oxidation



peak.

The TOF (s<sup>-1</sup>) for HER can be obtained by the following equation:

$$TOF = \frac{I \times N_A}{2 \times F \times \Gamma}$$

Where I is the current (A) during the linear scanning process, N<sub>A</sub> is Avogadro number, the factor 2 refers to two electrons required to produce one hydrogen molecule. F is the Faraday constant (96485 C mol<sup>-1</sup>), and  $\Gamma$  is the number of exposed active sites.

$\Gamma$  can be quantified by the CO stripping method and calculated from the following equation:

$$\Gamma = \frac{A_{\text{under CO peak}}}{2 \times e \times \nu}$$

where A<sub>under CO peak</sub> is the area of the CO oxidation peak, e is the charge of an electron, and  $\nu$  is the scan rate through the CV scans.

## Additional Figures and Tables

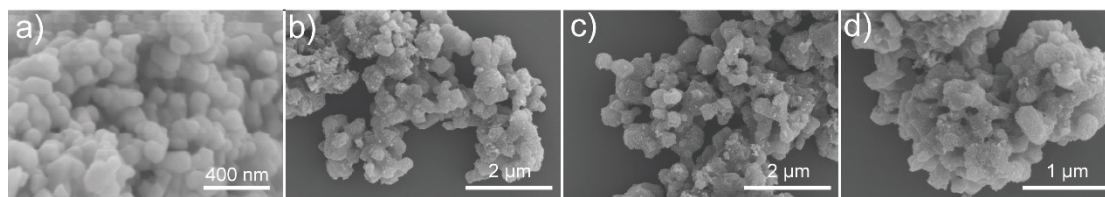

**Figure S1.** SEM image of a) C<sub>60</sub>/SBA-15, b) FCF, c) Ru/FCF, d) Ru/FCF-600.

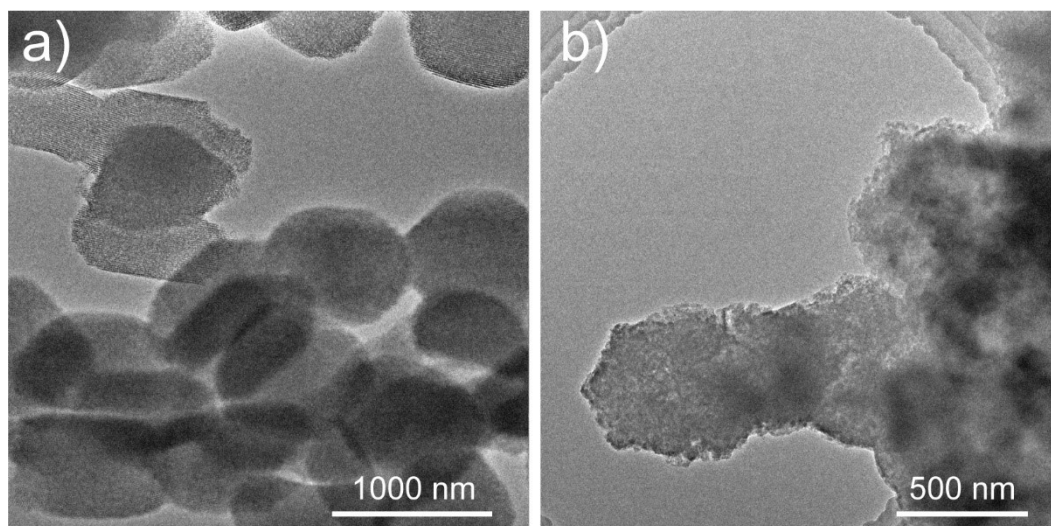

**Figure S2.** TEM images of a) SBA-15 and b) FCF.

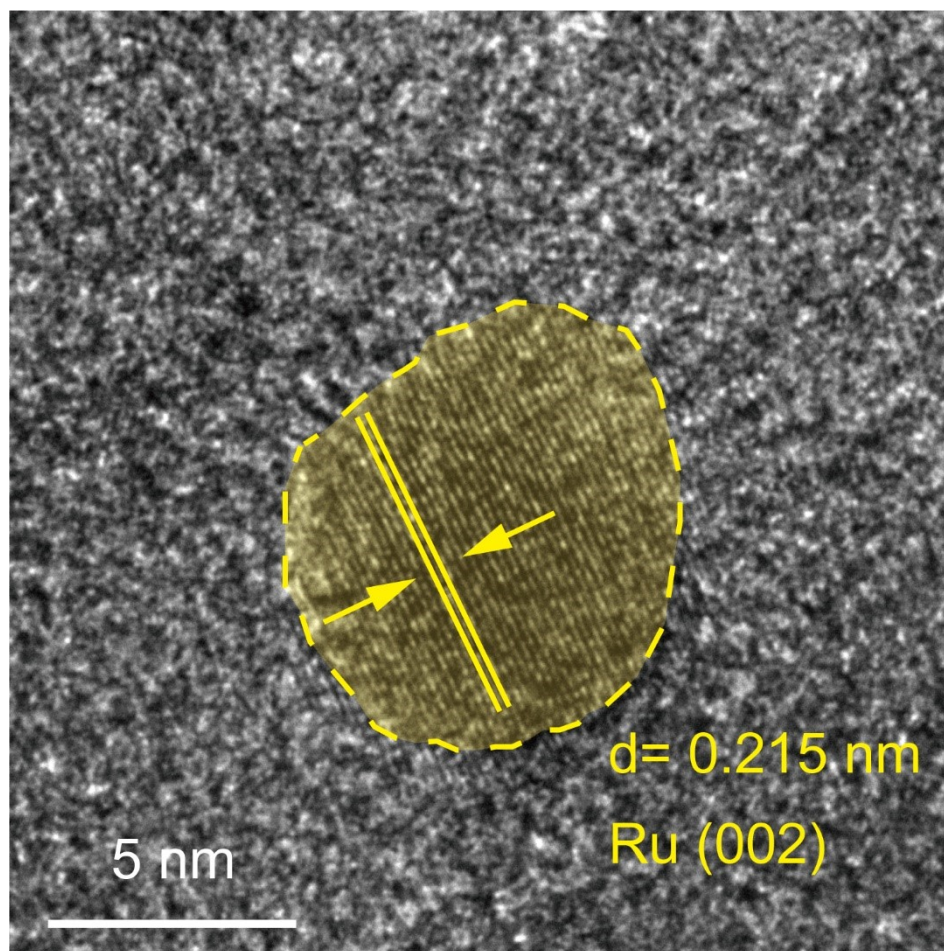

**Figure S3.** TEM images of the Ru/FCF-600.

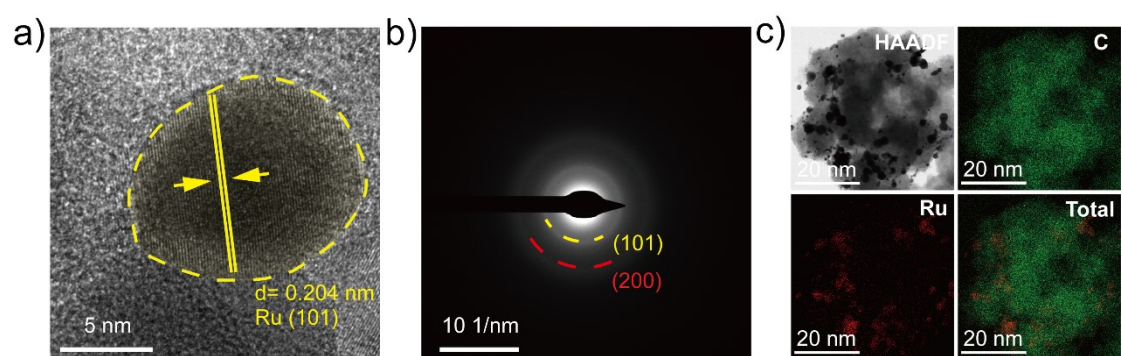

**Figure S4.** Structural and morphological characterization of Ru/FCF-500. a) HRTEM image, b) SAED pattern, c) Corresponding elemental mapping images of C (green) and Ru (red).

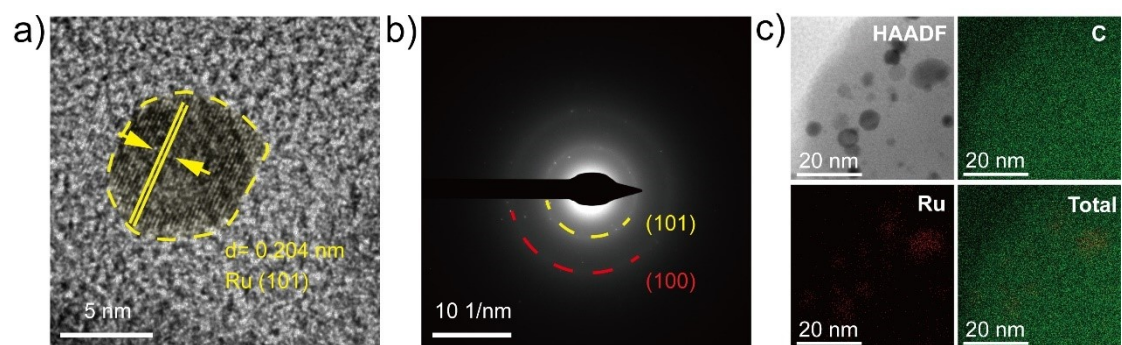

**Figure S5.** Structural and morphological characterization of Ru/FCF-700. a) HRTEM image, b) SAED pattern, c) Corresponding elemental mapping images of C (green) and Ru (red).

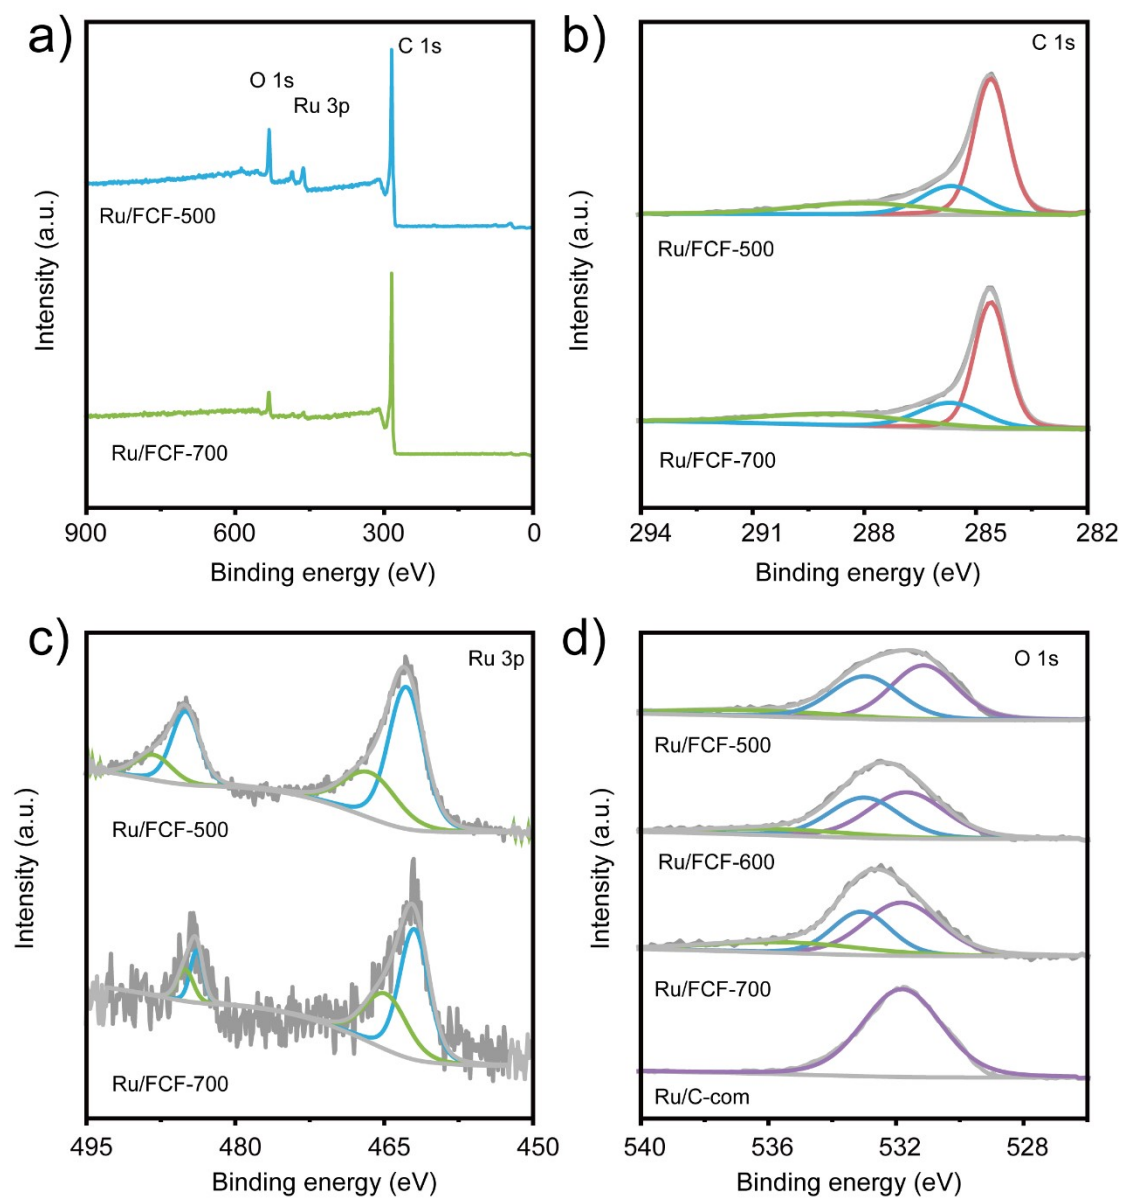

**Figure S6.** a) XPS survey spectra of Ru/FCF-500 and Ru/FCF-700. b) C 1s, c) Ru 3p spectra of Ru/FCF-500 and Ru/FCF-700. d) O 1s spectra of Ru/FCF-500, Ru/FCF-600, Ru/FCF-700, and commercial Ru/C.



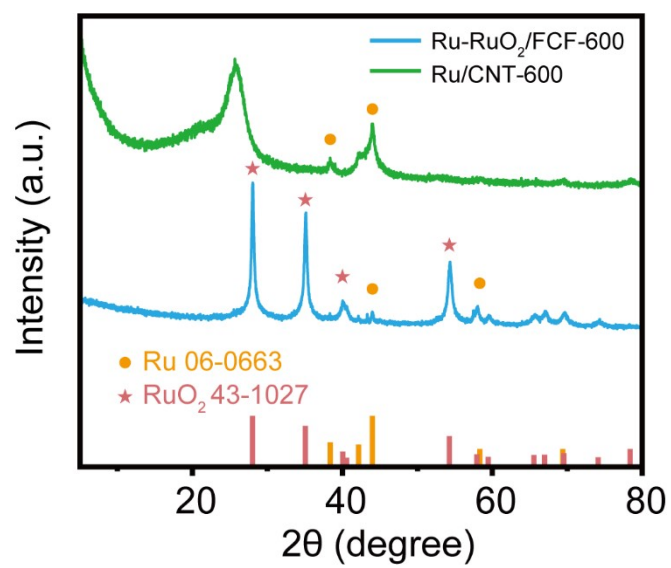

**Figure S7.** XRD patterns of Ru-RuO<sub>2</sub>/FCF-600 and Ru/CNT-600.



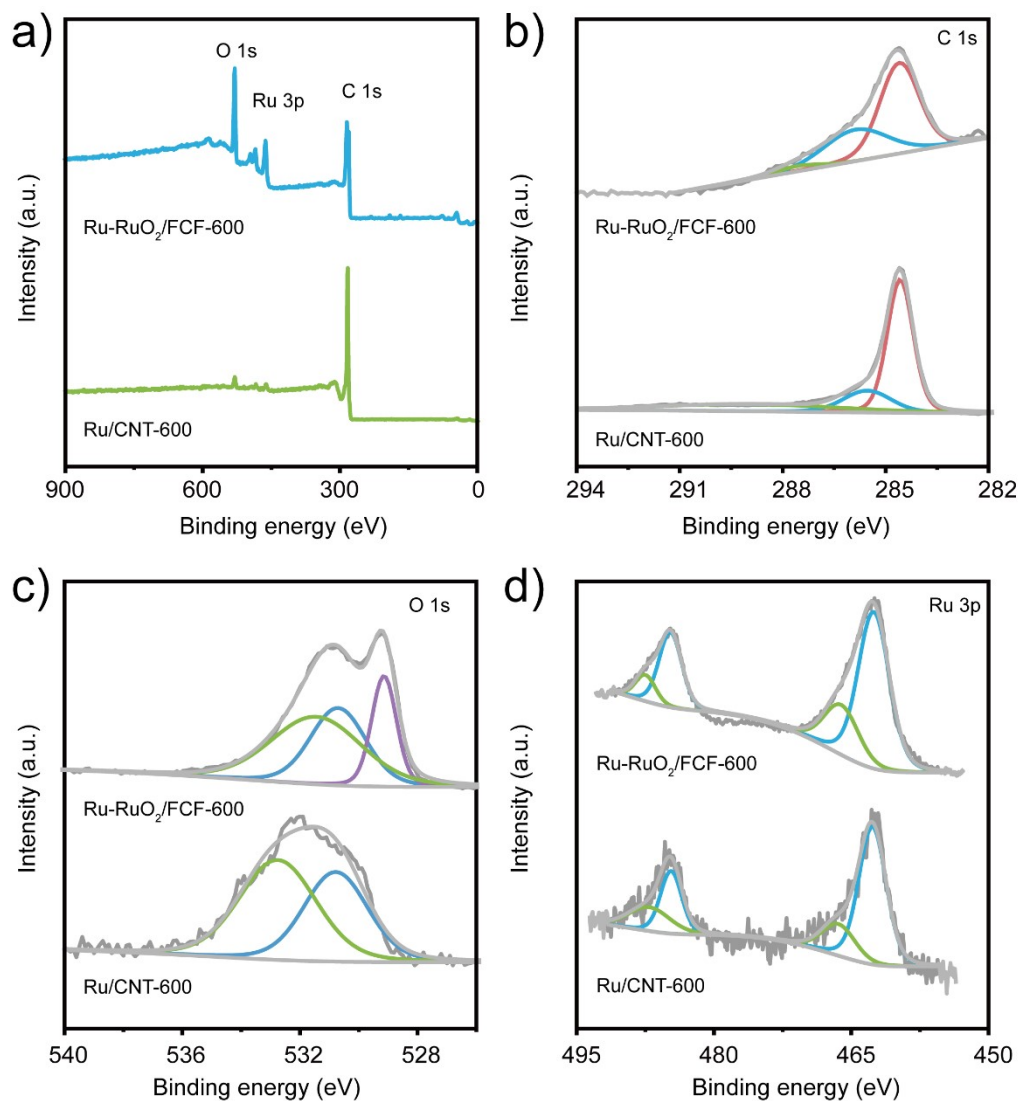

**Figure S8.** a) XPS survey spectra of Ru-RuO<sub>2</sub>/FCF-600 and Ru/CNT-600. b) C 1s, c) Ru 3p spectra of Ru-RuO<sub>2</sub>/FCF-600 and Ru/CNT-600. d) O 1s spectra of Ru-RuO<sub>2</sub>/FCF-600 and Ru/CNT-600.

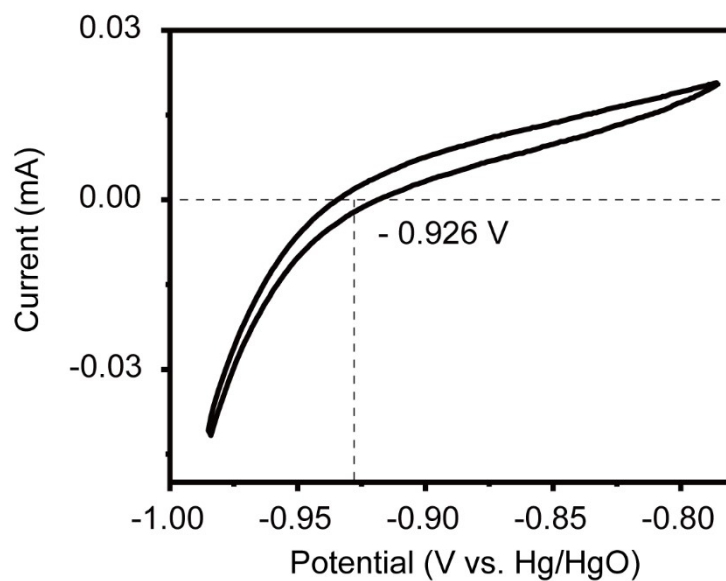

**Figure S9.** CV curve for calibration of Hg/HgO reference electrode in 1 M KOH.

Prior to all measurements, the reference electrode (Hg/HgO in alkaline medium) was calibrated against a reversible hydrogen electrode (RHE) in H<sub>2</sub>-saturated electrolyte using a standard three-electrode system, with a Pt plate as the working electrode and a Pt wire as the counter electrode. The measured potentials were then converted to the RHE scale according to the following equation:

$$E(\text{RHE}) = E(\text{Hg/HgO}) + 0.926(1 \text{ M KOH})$$

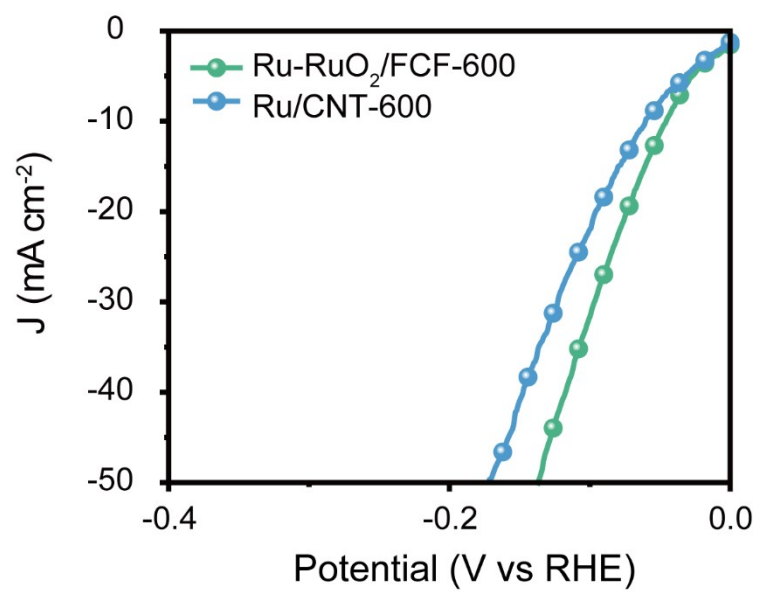

**Figure S10.** LSV curves of Ru-RuO<sub>2</sub>/FCF-600 and Ru/CNT-600.

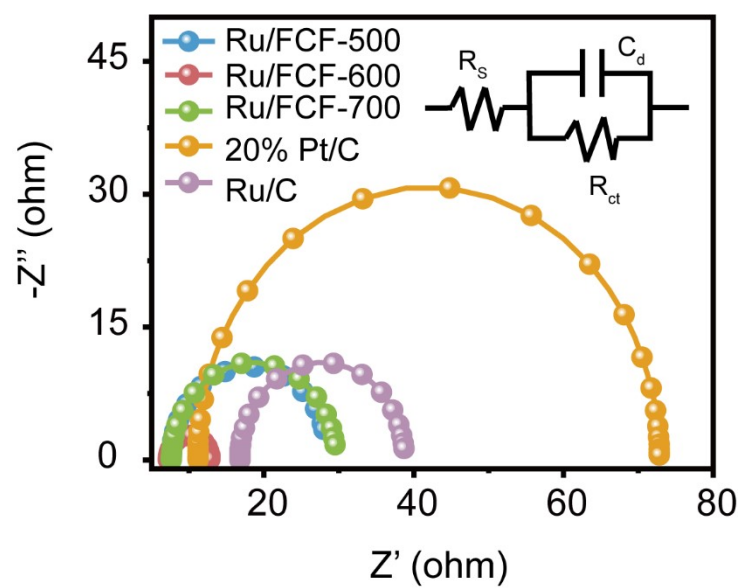

**Figure S11.** Nyquist plots of Ru/FCF-500, Ru/FCF-600, Ru/FCF-700, 20% Pt/C and commercial Ru/C of HER in 1.0 M KOH.

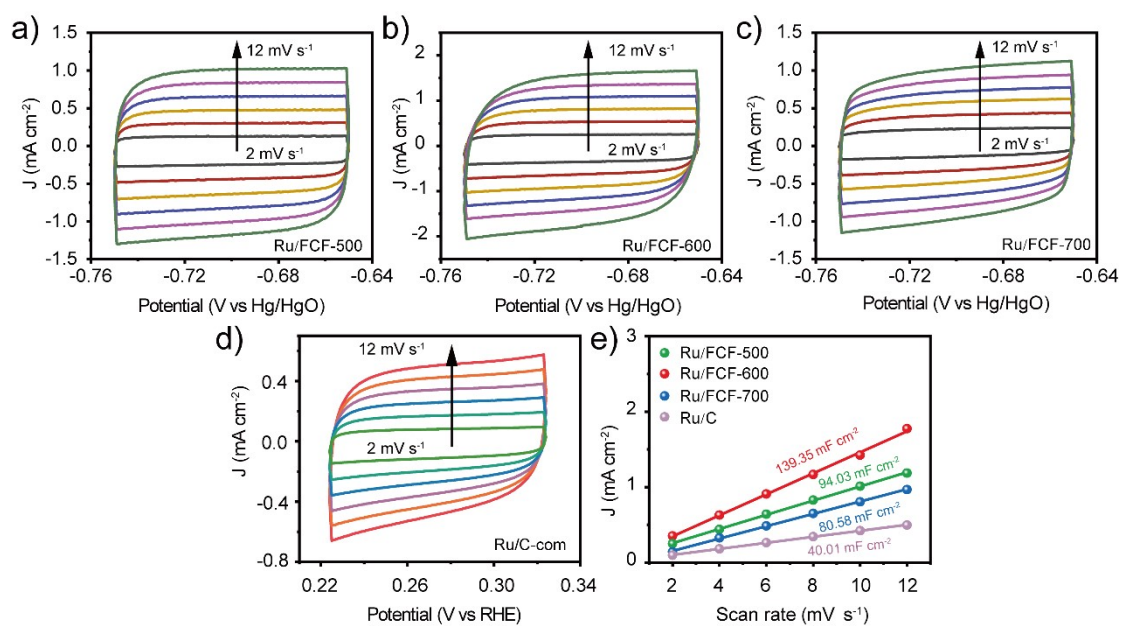

**Figure S12.** a) Ru/FCF-500, b) Ru/FCF-600, c) Ru/FCF-700 with a scan rate of 2, 4, 6, 8, 10, and 12 mV s<sup>-1</sup> in 1 M KOH. d) The corresponding plots of current density difference against scan rate.

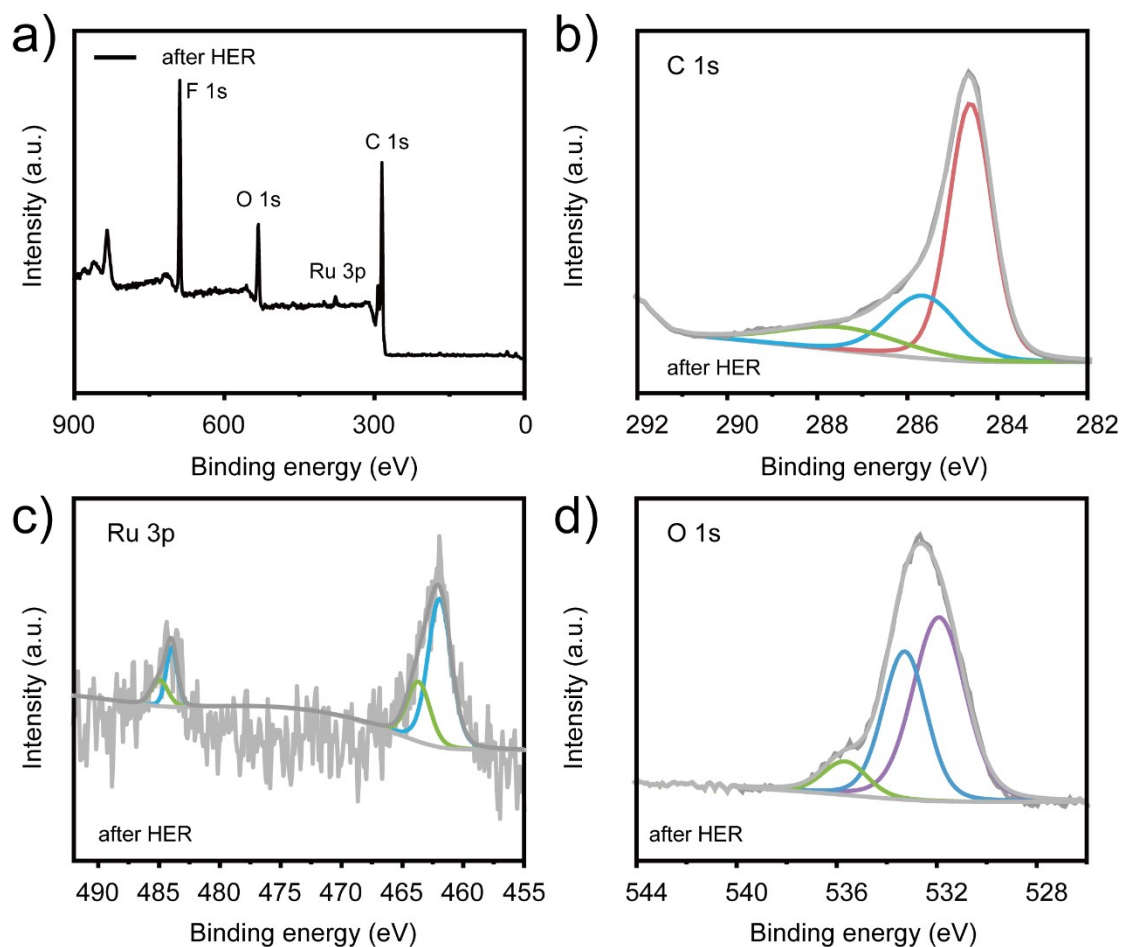

**Figure S13.** XPS spectra of Ru/FCF-600 after HER measurement. a) XPS survey spectrum, b) C 1s, c) Ru 3p, d) O 1s.

The fluorine (F) element signal detected in XPS survey spectrum S9a after the stability test is presumably attributed to the perfluorosulfonic acid polymer (Nafion binder) employed in the preparation of the working electrode, featuring a molecular structure rich in fluorine atoms.

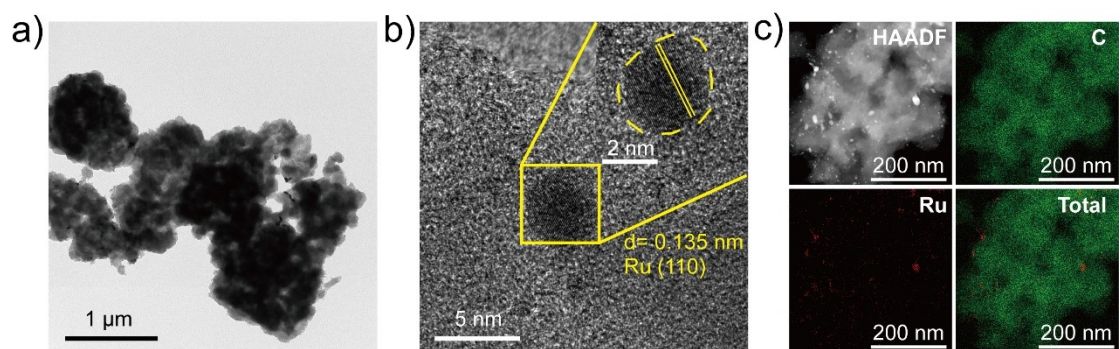

**Figure S14.** Structural and morphological characterization of Ru/FCF-600 after stability testing in 1 M KOH. a) TEM image, b) HRTEM image, c) SAED pattern, d) Corresponding elemental mapping images of C (green) and Ru (red).

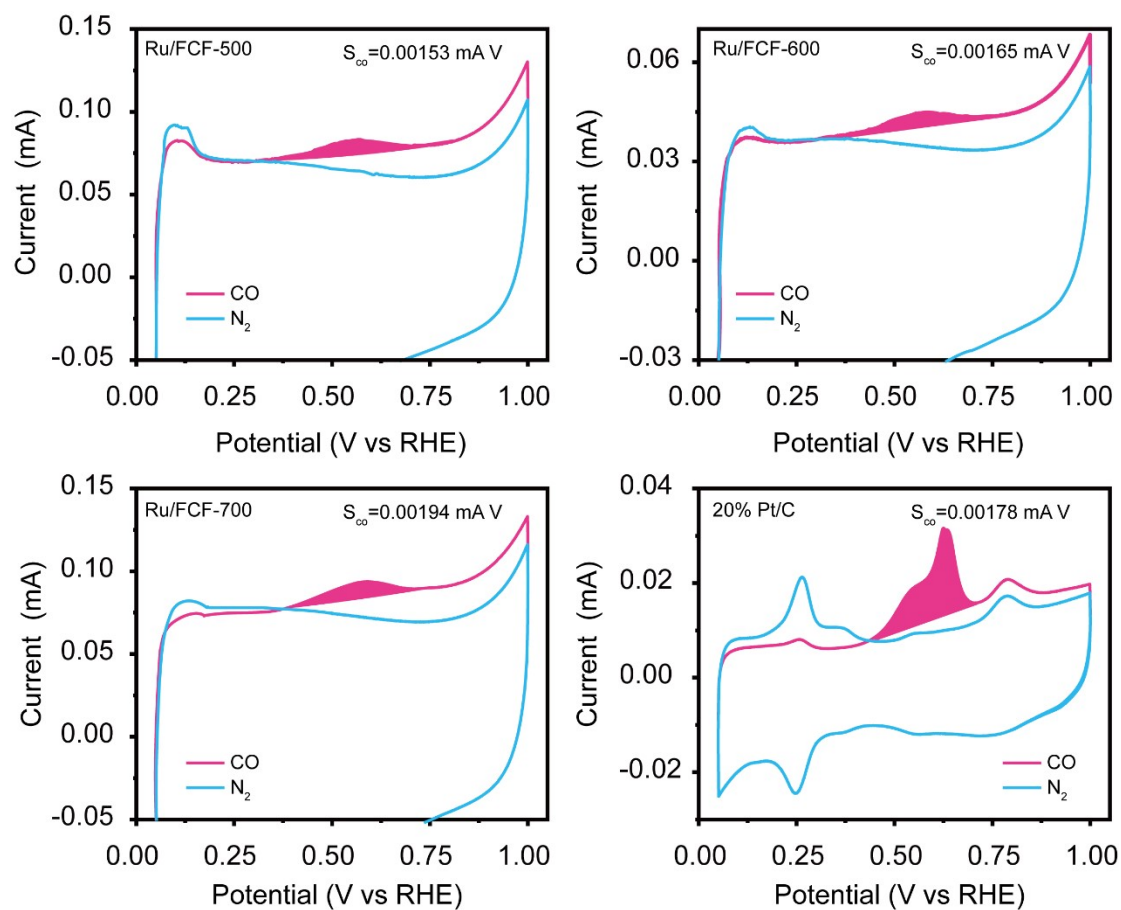

**Figure S15.** a-d) Background cycles (blue curves) and subsequent CO-stripping cycles (red curves) for Ru/FCF-500, Ru/FCF-600, Ru/FCF-700, and commercial Ru/C, respectively. The corresponding stripping charges, indicated by the red shaded areas, are obtained from the integrated peak areas.



**Table S1.** HER performance of the Ru/FCF-600 electrocatalyst in 1 M KOH.

| Sample                       | $\eta_{10}$ (mV) | Tafel slope (mV<br>dec <sup>-1</sup> ) | ECSA (cm <sup>2</sup> ) | $R_{ct}$ ( $\Omega$ ) |
|------------------------------|------------------|----------------------------------------|-------------------------|-----------------------|
| Ru/FCF-500                   | 58               | 137.60                                 | 94.03                   | 21.02                 |
| Ru/FCF-600                   | 23               | 37.80                                  | 139.35                  | 5.59                  |
| Ru/FCF-700                   | 62               | 70.70                                  | 80.58                   | 21.96                 |
| 20% Pt/C                     | 57               | 85.60                                  | --                      | 61.65                 |
| Ru/C                         | 77               | 73.72                                  | 40.01                   | 22.02                 |
| Ru-RuO <sub>2</sub> /FCF-600 | 46               | --                                     | --                      | --                    |
| Ru/CNT-600                   | 61               | --                                     | --                      | --                    |

**Table S2.** Comparison of TOFs of the Ru/FCF-600 under alkaline conditions with other reported HER catalysts.

| No. | Catalyst                                               | Overpotential (V) | TOF per active site ( $\text{H}_2 \text{ s}^{-1}$ ) | Reference                                  |
|-----|--------------------------------------------------------|-------------------|-----------------------------------------------------|--------------------------------------------|
| 1   | Ru/FCF-600                                             | 0.10              | 21.42                                               | This work                                  |
| 2   | 20% Pt/C                                               | 0.10              | 7.62                                                | This work                                  |
| 3   | Ru/C <sub>60</sub> -300                                | 0.10              | 10.50                                               | Angew. Chem. Int. Ed. 2025, 64, e202414149 |
| 4   | RuNi/CQDs                                              | 0.10              | 5.03                                                | Angew. Chem. Int. Ed. 2020, 59, 1718.      |
| 5   | Ru <sub>NPs</sub> -RuCr <sub>APs</sub> -N-C            | 0.10              | 13.15                                               | Adv. Mater. 2025, 37, 2419360              |
| 6   | Ru/Ni <sub>3</sub> V-LDH                               | 0.10              | 3.49                                                | J. Am. Chem. Soc. 2021, 144, 1174.         |
| 7   | Ru@Mn <sub>3</sub> O <sub>4</sub>                      | 0.10              | 8.50                                                | Angew. Chem. Int. Ed. 2025, e202504667     |
| 8   | Ru <sub>1,n</sub> -ZnFe <sub>2</sub> O <sub>x</sub> -C | 0.05              | 10.30                                               | Small. 2022, 18, 2204155.                  |
| 9   | Ru/O-CNT                                               | 0.05              | 2.96                                                | Adv. Funct. Mater. 2025, 35, 2418617.      |
| 10  | c-PRP DWNT/C                                           | 0.05              | 6.55                                                | Adv. Energy Mater. 2024, 14, 2304269.      |
| 11  | <u>Ru/NDC-4</u>                                        | 0.05              | 13.4                                                | Appl. Catal., B <b>2023</b> , 327, 122466. |
| 12  | Ru <sub>SA+NC</sub> /NiO-NF                            | 0.05              | 1.91                                                | Appl. Catal., B <b>2023</b> , 325, 122316. |
| 13  | RuP/C                                                  | 0.02              | 3.50                                                | Adv. Mater. 2018, 30, 1800047.             |
| 14  | Ru/p-NC                                                | 0.025             | 8.90                                                | J. Mater. Chem. A 2021, 9, 12196.          |
| 15  | Ru-FeP-CoP/NPC                                         | 0.15              | 13.22                                               | Carbon Energy. 2025, 7: e690.              |
| 16  | NiFeRu <sub>SA</sub> -DOBDC                            | 0.20              | 18.20                                               | Adv. Energy Mater. 2025, 15, 2404714.      |

**Table S3.** Summary of the recently reported Ru-based HER catalyst in 1 M KOH.

| No. | Catalyst                                    | $\eta_{10}$ (mV) | reference                                   |
|-----|---------------------------------------------|------------------|---------------------------------------------|
| 1   | Ru-RuO <sub>2</sub> /C <sub>60-x</sub>      | 7                | Angew. Chem. Int. Ed. 2025, e202503608.     |
| 2   | Ru/FCF-600                                  | 23               | This work                                   |
| 3   | RuAu-0.2                                    | 24               | Adv. Energy Mater., 2019, 9, 1803913.       |
| 4   | Ru@WNO-C                                    | 24               | Nano Energy 2021, 80, 105531.               |
| 5   | RuNiS-C                                     | 25               | Carbon 2020, 162, 172e180.                  |
| 6   | RuB <sub>2</sub>                            | 25               | ACS Energy Lett. 2020, 5, 2909.             |
| 7   | RuCo NSs                                    | 26               | Adv. Energy Mater. 2020, 10, 2002860.       |
| 8   | Ru/P-TiO <sub>2</sub>                       | 27               | Angew. Chem. Int. Ed., 2022,134, e202212196 |
| 9   | Ru <sub>d=2.4 Å</sub>                       | 27               | Adv. Mater. 2024, 36, 2310699               |
| 10  | Sr <sub>2</sub> RuO <sub>4</sub>            | 28               | Nat. Commun. 2022, 13, 7784.                |
| 11  | Ru/C                                        | 28.6             | Appl. Catal. B 2023, 323, 122145.           |
| 12  | PrRu <sub>0.5</sub> Co <sub>1.5</sub>       | 29               | Chem.-Eur. J.2023, 29, e202300205.          |
| 13  | PdH <sub>x</sub> @Ru                        | 30               | J. Am. Chem. Soc 2023, 145 5710–5717        |
| 14  | Ru-NiSe <sub>2</sub>                        | 30               | Chem.-Eur. J.2023, 29, e202300205.          |
| 15  | Ru/Ni-MoS <sub>2</sub>                      | 32               | Appl. Catal. B 2021, 298, 120557.           |
| 16  | cRu-Ni <sub>3</sub> N/NF                    | 32               | Energy Environ. Mater. 2023, 6, e12318.     |
| 17  | Ru <sub>1</sub> -NiCoP                      | 32               | Angew. Chem. Int. Ed. 2023, 62, e202308800. |
| 18  | MOC-Ru                                      | 33               | Adv. Mater. 2023, 35, 2303331               |
| 19  | Ru <sub>NP</sub> -Ru <sub>SA</sub> @CFN-800 | 33               | Adv. Funct. Mater. 2023, 33, 2213058.       |
| 20  | Ru/g-C <sub>3</sub> N <sub>4</sub> -2       | 34               | J. Mater. Chem. A 2021, 9, 15019-15026.     |
| 21  | MoO <sub>x</sub> -Ru hcp                    | 34               | ACS Nano 2022, 16, 14885-14894.             |

|    |                                         |      |                                                    |
|----|-----------------------------------------|------|----------------------------------------------------|
| 22 | RuCo-CAT/CC                             | 38   | Adv. Energy Mater. 2023, 13, 2204177.              |
| 23 | VO-Ru/HfO <sub>2</sub>                  | 39   | Nat. Commun. 2022, 13, 1270.                       |
| 24 | Ru/HfO <sub>2</sub>                     | 39   | Nat. Comm. 2022, 13, 1270                          |
| 25 | a-Ru@Co-DHC                             | 40   | Chin. J. Catal.2022, 43, 110-115.                  |
| 26 | MSOR1                                   | 43   | Adv. Funct. Mater. 2023, 33, 2210939               |
| 27 | Br-Ru-RuO <sub>2</sub> /MCC             | 44   | J. Colloid Interface Sci. 2023, 646, 391-398.      |
| 28 | (Ru-Co)O <sub>x</sub>                   | 44.1 | Angew. Chem. Int. Ed. 2020, 59, 17219-17224.       |
| 29 | Ru@Co/N-CNTs-2                          | 48   | ACS Sustainable Chem. Eng. 2020, 8, 24, 9136-9144. |
| 30 | Ru-MoP<br>NWAs/CFP                      | 49.9 | Dalton Trans., 2022, 51, 3875–3883.                |
| 31 | Ru <sub>1</sub> CoP/CDs-1000            | 51   | Angew. Chem. Int. Ed. 2021, 60, 7234-7244.         |
| 32 | Ru <sub>0.10</sub> @2H-MoS <sub>2</sub> | 51   | Appl. Catal. B-Environ. 2021, 298, 120490.         |
| 33 | Ru/Co <sub>4</sub> N-CoF <sub>2</sub>   | 53   | Chem. Eng. J. 2021, 414, 128865.                   |
| 34 | Ru SAs–Ni <sub>2</sub> P                | 57   | Nano Energy 2021, 80, 105467.                      |
| 35 | Ru-NiPS <sub>3</sub>                    | 58   | Nat. Commun. 2023, 14, 6462.                       |

**Table S4.** Summary of the recently reported Ru-based OWS catalyst in 1 M KOH.

| No. | Catalyst                                                                      | E <sub>10</sub> (mV) | reference                                     |
|-----|-------------------------------------------------------------------------------|----------------------|-----------------------------------------------|
| 1   | Ru@V-RuO <sub>2</sub> /C<br>HMS                                               | 1.437                | Adv. Mater. 2023, 35, 2206351                 |
| 2   | RuO <sub>2</sub> -300Ar                                                       | 1.45                 | Energy Environ. Sci. 2021, 14, 5433           |
| 3   | Ru-MoO <sub>3-x</sub> NF   <br>Fe <sub>3</sub> O <sub>4</sub> -NiFe LDH<br>NF | 1.46                 | Renewable Energy 2021, 177, 1346-1355.        |
| 4   | Ru/FCF-600    IrO <sub>2</sub>                                                | 1.47                 | This work                                     |
| 5   | Ru-NiFeP/NF                                                                   | 1.47                 | Appl. Surf. Sci. 2021,536, 147952.            |
| 6   | Ru-MnFeP                                                                      | 1.47                 | Adv. Energy Mater. 2021, 10, 2000814.         |
| 7   | CoRu/C                                                                        | 1.49                 | Chem. Eng. J. 2024, 492, 152337               |
| 8   | M <sub>2</sub> Ru <sub>1</sub>    M <sub>2</sub> Ru <sub>1</sub> O            | 1.49                 | Nano Res. 2022, 15, 1020-1026.                |
| 9   | RuCo@CDs                                                                      | 1.50                 | J. Mater. Chem. A 2020, 8, 19, 9638-9645.     |
| 10  | Ru/Co-N-C-800 °C                                                              | 1.50                 | Adv. Mater. 2022, 34, 2110103.                |
| 11  | Ru/RuS <sub>2</sub> -2                                                        | 1.501                | Angew. Chem. Int. Ed. 2021, 60, 12328.        |
| 12  | NiFeRu-LDH                                                                    | 1.52                 | Adv. Mater. 2018, 30, 10, 1706279.            |
| 13  | Pt/C/NF   <br>RuO <sub>2</sub> /NF                                            | 1.53                 | ChemCatChem 2022, 14, e202201010              |
| 14  | 20% Pt/C    IrO <sub>2</sub>                                                  | 1.54                 | This work                                     |
| 15  | Ru/RuO <sub>2</sub> -<br>MoO <sub>2</sub> (RRMC-500)                          | 1.54                 | J. Colloid Interface Sci. 2021, 604, 508-516. |
| 16  | Ru <sub>NP</sub> -Ru <sub>SA</sub> @CFN-<br>800    IrO <sub>2</sub>           | 1.54                 | Adv. Funct. Mater. 2023, 33, 2213058.         |
| 17  | Ru/RuO <sub>2</sub> /NC  RuO <sub>2</sub>                                     | 1.58                 | Chem. Eng. J. 2022, 437, 135456.              |
| 18  | RuNi nanoplates                                                               | 1.58                 | Nano Energy 2018, 47, 1-7.                    |
| 19  | Ru-<br>FeRu@C/NC  Ru-<br>FeRu@C/NC                                            | 1.63                 | Chem. Eng. J. 2022, 437, 135456.              |
| 20  | Ru@N-graphene                                                                 | 1.65                 | ACS Catal. 2019, 9, 11, 9897-9904.            |

**Table S5.** The comparison of AEMWE performance for Ru/FCF-600 with other reported electrocatalysts in alkaline solution.

| Cathodic catalysts                 | Anodic catalysts            | Activity                   | reference                                 |
|------------------------------------|-----------------------------|----------------------------|-------------------------------------------|
| Ru/FCF-600                         | IrO <sub>2</sub>            | 1.65V@ 1A cm <sup>-2</sup> | This work                                 |
| NS-Ru                              | Commercial IrO <sub>2</sub> | 1.70V@ 1A cm <sup>-2</sup> | Adv. Funct. Mater. 2023, 33, 2212321.     |
| MoO <sub>2</sub> @Ru               | NiFe-LDH/NF                 | 1.78V@ 1A cm <sup>-2</sup> | Adv. Energy Mater. 2023, 13, 2301492.     |
| MnRu/C <sub>60</sub> -3            | NiFeLDH                     | 1.79V@ 1A cm <sup>-2</sup> | Adv. Funct. Mater. 2024, 2409406.         |
| Ru <sub>1</sub> -Mo <sub>2</sub> C | NiFe-LDH/NF                 | 1.83V@ 1A cm <sup>-2</sup> | Energy Environ. Sci. 2024, 17, 1397-1406. |
| Pt@S-NiFe LDH                      | S-NiFe LDH                  | 1.90V@ 1A cm <sup>-2</sup> | Adv. Mater. 2023, 35, 2208209.            |
| 20% Pt/C                           | IrO <sub>2</sub>            | 1.91@ 1A cm <sup>-2</sup>  | This work                                 |
| CeO <sub>2</sub> -Ru aerogel       | NiFe-LDH/NF                 | 1.99V@ 1A cm <sup>-2</sup> | Adv. Energy Mater. 2025, 15, 2405681.     |
